# Supplementary material for: Cysteine Proteases from V. cundinamarcensis (C. candamarcensis) Inhibit Melanoma Metastasis and Modulate Expression of Proteins Related to Proliferation, Migration and Differentiation
Source: MDPI journal article supplement (doi:10.3390/ijms19102846), 2018-09-20
Supplement: s1 [file s1]

**Supplemental table 1: Proteins differently expressed among comparison of B16-F10 control, B16-F10 treated, Melan-a control and Melan-a treated**

| Spot | Protein                          | GI                          | Mr/pI           | Score | Coverage (%) | Peptides                                                                                                                                                                            | Abundance                                       |
|------|----------------------------------|-----------------------------|-----------------|-------|--------------|-------------------------------------------------------------------------------------------------------------------------------------------------------------------------------------|-------------------------------------------------|
| 1    | phosphoglycerate kinase          | <a href="#">gi 202423</a>   | /44508<br>/7.53 | 658   | 22           | K.LGDVYVNDAFGTAHR.A<br>K.ALESPERPFLAILGGAK.V<br>K.ITLPVDFVTADKFDENAK.T<br>K.QIVWNGPVGVFWEAFAR.G<br>K.QIVWNGPVGVFWEAFAR.G<br>K.DCVGPEVENACANPAAGTVILLENLR.F                          | BC<BT<br>1.26<br>MC<BC<br>2.33<br>MC<BT<br>2.92 |
| 2    | Enolase 1, (alpha)               | <a href="#">gi 59808815</a> | /47128<br>/6.16 | 667   | 23           | R.IGAEVYHNLK.N<br>R.GNPTVEVDLYTAK.G<br>R.YITPDQLADLYK.S<br>K.LAQSNWGVVMVSHR.S<br>R.AAVPSGASTGIYEALRL.D<br>K.LAMQEFMILPVGASSFR.E<br>K.AGYTDQVVIGMDVAASEFYR.S                         | BC>BT<br>2.61<br>MC=BC<br>MC>BT<br>3.54         |
| 3    | heat shock protein 65            | <a href="#">gi 51455</a>    | /60903<br>/5.91 | 871   | 16           | R.TVIEQSWGSPK.V<br>R.AAVEEGIVLGGGCALLR.C<br>K.ISSVQSIVPALEIA <del>N</del> AHR.K<br>R.KPLVIIAEDVDGEALSTLVLR.L<br>K.LVQDVANNTNEEAGDGT <del>T</del> TATVLAR.S                          | BC>BT<br>1.14<br>MC=BC<br>MC=BT                 |
|      | put. beta-actin (aa 27-375)      | <a href="#">gi 49868</a>    | /39161<br>/5.78 | 629   | 22           | R.AVFPSIVGR.S<br>R.GYSFTTTAER.E<br>K.QEYDESGPSIVHR.K<br>K.IWHHTFYNELR.V<br>K.SYELPDGQVITIGNER.F<br>K.DLYANTVLSGGT <del>T</del> MYPGIADR.M<br>K.DLYANTVLSGGT <del>T</del> MYPGIADR.M |                                                 |
| 4    | heat shock protein 70<br>cognate | <a href="#">gi 309319</a>   | 70793<br>5.37   | 646   | 14           | K.FELTGIPPAPR.G<br>K.VEIANDQGNR.T<br>R.FEELNADLFR.G<br>R.RFDDAVVQSDMK.H<br>R.TTPSYVAFTDTER.L<br>K.STAGDTHLGGEDFDNR.M<br>K.TVTNAVVTVPAYFNDSQR.Q                                      | BC>BT<br>1.34<br>MC=BC<br>MC=BT                 |

|   |                                |                              |               |     |    |                                                                                                                                                                                                   |                                                 |
|---|--------------------------------|------------------------------|---------------|-----|----|---------------------------------------------------------------------------------------------------------------------------------------------------------------------------------------------------|-------------------------------------------------|
| 5 | phosphoglycerate mutase<br>1   | <a href="#">gi 114326546</a> | 28814<br>6.67 | 824 | 54 | R.VLIAAHGNSLR.G<br>R.HGESAWNLENR.F<br>R.DAGYEFDIQFTSVQK.R<br>R.FSGWYDADLSPAGHEEAK.R<br>K.NLKPIKPMQFLGDEETVR.K<br>K.NLKPIKPMQFLGDEETVR.K<br>R.SYDVPPPPMEPDHPFYSNISK.D<br>R.SYDVPPPPMEPDHPFYSNISK.D | BC<BT<br>1.22<br>MC<BC<br>1.27<br>MC<BT<br>1.55 |
| 6 | gamma-actin                    | <a href="#">gi 809561</a>    | 40992<br>5.56 | 691 | 25 | K.AGFAGDDAPR.A<br>R.GYSFTTTAER.E<br>R.AVFPSIVGRPR.H<br>K.QEYDESGPSIVHR.K<br>K.IWHHTFYNELR.V<br>K.SYELPDGQVITIGNER.F<br>K.DLYANTVLSGGTMYPGIADR.M<br>K.DLYANTVLSGGTMYPGIADR.M                       | BC>BT<br>1.13<br>MC=BC<br>MC=BT                 |
|   | put. beta-actin (aa 27-375)    | <a href="#">gi 49868</a>     | 39161<br>5.78 | 629 | 22 | R.AVFPSIVGR.S<br>R.GYSFTTTAER.E<br>K.QEYDESGPSIVHR.K<br>K.IWHHTFYNELR.V<br>K.SYELPDGQVITIGNER.F<br>K.DLYANTVLSGGTMYPGIADR.M<br>K.DLYANTVLSGGTMYPGIADR.M                                           |                                                 |
| 7 | triosephosphate<br>isomerase   | <a href="#">gi 54855</a>     | 26679<br>6.90 | 516 | 25 | K.IAVAAQNQCYK.V<br>K.SNVNDGVAQSTR.I<br>R.HVFGESDELIGQK.V<br>K.TATPQQAQEVHEK.L<br>K.DLGATWVVLGHSER.R<br>R.RHVFGESDELIGQK.V                                                                         | BC<BT<br>1.42<br>MC=BC<br>MC<BT<br>1.56         |
|   | 1-Cys peroxiredoxin<br>protein | <a href="#">gi 4139186</a>   | 24825<br>5.98 | 94  | 8  | R.NFDEILR.V<br>K.LSILYPATTGR.N                                                                                                                                                                    |                                                 |

|    |                                  |                              |               |     |    |                                                                                                                                                                                                              |                                                 |
|----|----------------------------------|------------------------------|---------------|-----|----|--------------------------------------------------------------------------------------------------------------------------------------------------------------------------------------------------------------|-------------------------------------------------|
| 8  | phosphoglycerate mutase<br>1     | <a href="#">gil114326546</a> | 28814<br>6.67 | 824 | 54 | R.HYGGLTGLNK.A<br>R.VLIAAHGNSLR.G<br>R.HGESAWNLENR.F<br>R.ALPFWNEEIVPQIK.E<br>R.DAGYEFDICFTSVQK.R<br>R.FSGWYDADLSPAGHEEAK.R<br>K.NLKPIKPMQFLGDEETVR.K<br>K.NLKPIKPMQFLGDEETVR.K<br>R.YADLTEDQLPSCESLKDTIAR.A | BC<BT<br>1.25<br>MC=BC<br>MC<BT<br>1.37         |
| 9  | cofilin-1                        | <a href="#">gil6680924</a>   | 18548<br>8.22 | 519 | 40 | K.MLPDKDCR.Y<br>K.AVLFCLEDKK.N<br>K.LGGSAVISLEGKPL.-<br>K.HELQANCYEEVK.D<br>K.HELQANCYEEVKDR.C<br>K.EILVGDVGGTVDDPYTTTFVK.M                                                                                  | BC>BT<br>1.35<br>MC=BC<br>MC>BT<br>1.50         |
| 10 | pyruvate kinase M                | <a href="#">gil551295</a>    | 57824<br>7.58 | 687 | 24 | K.GDYPLEAVR.M<br>R.LDIDSAPITAR.N<br>R.NTGIICTIGPASR.S<br>K.IYVDDGLISLQVK.E<br>K.DAVLNAWAEDVDLR.V<br>R.FDEILEASDGIMVAR.G<br>R.LNFSHGTHEYHAETIK.N<br>R.EAEAAIYHLQLFEELR.R<br>R.EATESFASDPILYRPVAVALDTK.G       | BC<BT<br>1.12<br>MC=BC<br>MC=BT                 |
| 11 | heat shock protein 70<br>cognate | <a href="#">gil309319</a>    | 70793<br>5.37 | 646 | 14 | K.FELTGIPPAPR.G<br>K.VEIIANDQG NR.T<br>R.FEELNADLFR.G<br>R.RFDDAVVQSDMK.H<br>R.TTPSYVAFTDTER.L<br>K.STAGDTHLGGEDFDNR.M<br>K.TVTNAVVTVPAYFNDSQR.Q                                                             | BC>BT<br>1.12<br>MC>BC<br>1.16<br>MC>BT<br>1.30 |

|    |                                             |                              |               |     |    |                                                                                                                                             |                                         |
|----|---------------------------------------------|------------------------------|---------------|-----|----|---------------------------------------------------------------------------------------------------------------------------------------------|-----------------------------------------|
|    | Rho GDP dissociation inhibitor (GDI) alpha  | <a href="#">gi 13435747</a>  | 23377<br>5.12 | 566 | 26 | K.YIQHTYR.K<br>K.TDYMVGSYGPR.A<br>K.IDKTDYMVGSYGPR.A<br>R.VAVSADPNVPNVIVTR.L<br>K.SIQEIQLDKDDESLR.K<br>K.SIQEIQLDKDDESLRK.Y                 |                                         |
| 12 | nucleophosmin isoform 1                     | <a href="#">gi 6679108</a>   | 32540<br>4.62 | 417 | 19 | K.DLKPSTPR.S<br>K.VDNDENEHQLSLR.T<br>R.MTDQEAIQDLWQWR.K<br>R.MTDQEAIQDLWQWR.K<br>K.MSVQPTVSLGGFEITPPVVLRL.L<br>K.MSVQPTVSLGGFEITPPVVLRL.L   | BC>BT<br>1.30<br>MC<BC<br>1.40<br>MC=BT |
| 13 | glyceraldehyde-3-phosphate dehydrogenase    | <a href="#">gi 6679937</a>   | 35787<br>8.44 | 442 | 19 | R.VPTPNVSVVDLT <u>C</u> R.L<br>K.LVINGKPITIFQER.D<br>K.LISWYDNEYGYSNR.V<br>K.VIHDNFGIVEGLMTTVHAITATQK.T                                     | BC<BT<br>1.26<br>MC=BC<br>MC<BT<br>1.23 |
|    | glutathione S-transferase P 1               | <a href="#">gi 10092608</a>  | 23594<br>7.68 | 216 | 12 | -.PPYTIVYFPVR.G<br>K.FEDGDLTLYQSNAILR.H                                                                                                     |                                         |
| 14 | heat shock protein 65                       | <a href="#">gi 51455</a>     | 60903<br>5.91 | 871 | 16 | R.TVIEQSWGSPK.V<br>R.AAVEEGIVLGGGC <u>A</u> LLR.C<br>K.ISSVQSIVPALEIANAHR.K<br>R.KPLVIIAEDVDGEALSTLVNLRL.L<br>K.LVQDVANNTNEEAGDGTTTATVLAR.S | BC>BT<br>1.14<br>MC<BC<br>1.18<br>MC=BT |
|    | chaperonin subunit 8 (theta), isoform CRA_b | <a href="#">gi 148665922</a> | 54021<br>5.19 | 96  | 4  | R.FAEAFEAIPIR.-<br>-.LFTVNDAAITLR.F                                                                                                         |                                         |
| 15 | Sui1 homolog                                | <a href="#">gi 4868333</a>   | 12668<br>6.04 | 208 | 26 | K.TLTTVQGIADDYDK.K<br>K.GDDLLPAGTEDYIHIR.I                                                                                                  | BC>BT<br>1.23                           |

|    |                                                                                     |                              |               |     |    |                                                                                                                                                            |                                                 |
|----|-------------------------------------------------------------------------------------|------------------------------|---------------|-----|----|------------------------------------------------------------------------------------------------------------------------------------------------------------|-------------------------------------------------|
|    | serine (or cysteine)<br>peptidase inhibitor, clade<br>H, member 1, isoform<br>CRA_a | <a href="#">gi 148684430</a> | 44954<br>9.01 | 94  | 2  | R.DNQSGSLLFIGR.L                                                                                                                                           | MC=BC<br>MC>BT<br>1.38                          |
| 16 | Stathmin                                                                            | <a href="#">gi 9789995</a>   | 17264<br>5.76 | 208 | 22 | K.DKHVEEVR.K<br>K.DKHVEEVRK.N<br>K.ESVPDFPLSPPK.K<br>R.ASGQAFELILSPR.S                                                                                     | BC>BT<br>1.20<br>MC>BC<br>1.56<br>MC>BT<br>1.87 |
| 18 | calcyclin binding protein                                                           | <a href="#">gi 3142331</a>   | 28301<br>7.78 | 175 | 17 | K.TDTVILCR.K<br>K.ISNYGWDQSDK.F<br>K.IYITLTGVHQVPTENVQVHFTER.S                                                                                             | BC>BT<br>1.16<br>MC<BC<br>1.21                  |
|    | eukaryotic translation<br>initiation factor 4H                                      | <a href="#">gi 15808988</a>  | 27324<br>6.67 | 110 | 5  | K.EALTYDGALLGDR.S                                                                                                                                          | MC=BT                                           |
| 19 | phosphoglycerate kinase                                                             | <a href="#">gi 202423</a>    | 44508<br>7.53 | 658 | 22 | K.LGDVYVNDAFGTAHR.A<br>K.ALESPERPFLAILGGAK.V<br>K.ITLPVDFVTADKFDENAK.T<br>K.QIVWNGPVGVFWEAFAR.G<br>K.QIVWNGPVGVFWEAFAR.G<br>K.DCVGPEVENACANPAAGTVILLENLR.F | BC<BT<br>1.28<br>MC<BC<br>2.21<br>MC<BT<br>2.83 |
| 20 | Prohibitin                                                                          | <a href="#">gi 6679299</a>   | 29802<br>5.57 | 265 | 16 | R.FDAGELITQR.E<br>K.DLQNVNITLR.I<br>R.IYTSIGEDYDER.V<br>R.KLEAAEDIAYQLSR.S                                                                                 | BC<BT<br>1.13<br>MC=BC<br>MC=BT                 |

|    |                                                                |                              |               |     |    |                                                                                                                                                                                                  |                                                 |
|----|----------------------------------------------------------------|------------------------------|---------------|-----|----|--------------------------------------------------------------------------------------------------------------------------------------------------------------------------------------------------|-------------------------------------------------|
|    | glyoxalase domain-containing protein 4                         | <a href="#">gi 255003777</a> | 33296<br>5.28 | 110 | 11 | K.SDEWFATR.N<br>R.FQTVHFFR.D<br>K.LELQGIQGAVDHAAAFGR.I                                                                                                                                           |                                                 |
| 22 | translationally-controlled tumor protein                       | <a href="#">gi 6678437</a>   | 19450<br>4.76 | 146 | 13 | K.GKLEEQKPER.V<br>R.DLISHDELFSDIYK.I                                                                                                                                                             | BC>BT<br>1.26<br>MC>BC<br>1.39<br>MC>BT<br>1.75 |
|    | prostaglandin E synthase 3                                     | <a href="#">gi 9790017</a>   | 18709<br>4.36 | 140 | 18 | R.SILCCLR.K<br>R.KGESGQSWPR.L<br>K.LTFSC_LGGSDNFK.H                                                                                                                                              |                                                 |
|    | eukaryotic translation initiation factor 3 subunit K isoform 1 | <a href="#">gi 21312044</a>  | 25070<br>4.81 | 87  | 5  | R.YNPENLATLER.Y                                                                                                                                                                                  |                                                 |
| 23 | histidine triad nucleotide-binding protein 1                   | <a href="#">gi 33468857</a>  | 13768<br>6.36 | 533 | 71 | K.IIFEDDR.C<br>K.AQVAQPGGDTIFGK.I<br>R.C_LAFHDISPQAPTHFLVIPK.K<br>R.MVVNEGADGGQSVYHIHLHVLGGR.Q<br>R.MVVNEGADGGQSVYHIHLHVLGGR.Q<br>K.KHISQISVADDDDESLLGHLMIVGK.K<br>K.KHISQISVADDDDESLLGHLMIVGK.K | BC=BT<br>MC<BC<br>1.68<br>MC<BT<br>1.50         |
| 24 | protein disulfide-isomerase A3 precursor                       | <a href="#">gi 112293264</a> | 56643<br>5.88 | 690 | 20 | K.QAGPASVPLR.T<br>K.DASVVGFFR.D<br>K.FVMQEEFSR.D<br>R.LAPEYEEAATR.L<br>R.FAHTNIESLVK.E<br>R.ELNDFISYLQR.E<br>K.EYDDNGEGITIFRPLHLANK.F<br>K.TFSHELSDFGLESTTGEVPVVAIR.T                            | BC=BT<br>MC<BC<br>1.36<br>MC<BT<br>1.31         |
| 25 | fatty acid-binding protein, epidermal isoform 1                | <a href="#">gi 6754450</a>   | 15127<br>6.14 | 320 | 32 | K.ELGVGLALR.K<br>K.FDETTADGR.K<br>R.LMESHGFEEYMK.E<br>R.LMESHGFEEYMK.E<br>K.MIVECVMNNATCTR.V<br>K.MIVECVMNNATCTR.V                                                                               | BC=BT<br>MC<BC<br>1.35<br>MC<BT<br>1.36         |

|    |                                           |                              |               |     |    |                                                                                                                                                                       |                                         |
|----|-------------------------------------------|------------------------------|---------------|-----|----|-----------------------------------------------------------------------------------------------------------------------------------------------------------------------|-----------------------------------------|
| 26 | 10 kDa heat shock protein, mitochondrial  | <a href="#">gi 6680309</a>   | 10956<br>7.93 | 330 | 43 | K.FLPLFDR.V<br>R.KFLPLFDR.V<br>K.VLLPEYGGTK.V<br>K.VLQATVVAVGSGGK.G<br>K.VVLDDKDYFLFR.D                                                                               | BC=BT<br>MC<BC<br>1.57<br>MC<BT<br>1.53 |
| 27 | Enolase 1, (alpha)                        | <a href="#">gi 59808815</a>  | 47128<br>6.16 | 667 | 23 | R.IGAEVYHNLK.N<br>R.GNPTVEVDLYTAK.G<br>R.YITPDQLADLYK.S<br>K.LAQSNWGVVMVSHR.S<br>R.AAVPSGASTGIYEALRL.D<br>K.LAMQEFMILPVGASSFR.E<br>K.AGYTDQVVIGMDVAASEFYR.S           | BC=BT<br>MC<BC<br>1.33<br>MC=BT         |
| 28 | cytochrome b5                             | <a href="#">gi 13385268</a>  | 15232<br>4.96 | 426 | 41 | K.STWVILHHK.V<br>K.TYIIGELHPDDR.S<br>K.FLEEHPPGEEVLR.E<br>R.EQAGGDATENFEDVGHSTDAR.E                                                                                   | BC=BT<br>MC<BC<br>5.28<br>MC<BT<br>5.03 |
| 29 | glyceraldehyde-3-phosphate dehydrogenase  | <a href="#">gi 6679937</a>   | 35787<br>8.44 | 442 | 19 | R.VPTPNVSVDLTQR.L<br>K.LVINGKPITIFQER.D<br>K.LISWYDNEYGYSNR.V<br>K.VIHDNFGIVEGLMTTVHAITATQK.T                                                                         | BC=BT<br>MC<BC<br>1.21<br>MC<BT<br>1.29 |
|    | L-lactate dehydrogenase A chain isoform 1 | <a href="#">gi 6754524</a>   | 36475<br>7.62 | 151 | 9  | K.LVIITAGAR.Q<br>K.VTLTPEEEAR.L<br>R.VIGSGCNLDSAR.F                                                                                                                   |                                         |
| 30 | protein disulfide-isomerase A3 precursor  | <a href="#">gi 112293264</a> | 56643<br>5.88 | 690 | 20 | K.QAGPASVPLR.T<br>K.DASVVGFFR.D<br>K.FVMQEEFSR.D<br>R.LAPEYAAAATR.L<br>R.FAHTNIESLVK.E<br>R.ELNDFISYLQR.E<br>K.EYDDNGEGITIFRPLHLANK.F<br>K.TFSHELSDFGLESTTGEVPVVAIR.T | BC=BT<br>MC<BC<br>1.29<br>MC=BT         |
|    | alpha-fetoprotein, partial                | <a href="#">gi 191765</a>    | 47195<br>5.47 | 212 | 9  | K.APQVSTPTLVEAAR.N<br>K.LGEYGFQNAILVR.Y<br>K.DVFLGTFLYEYSR.R                                                                                                          |                                         |

|    |                                             |                             |               |     |    |                                                                                                                                                            |                                         |
|----|---------------------------------------------|-----------------------------|---------------|-----|----|------------------------------------------------------------------------------------------------------------------------------------------------------------|-----------------------------------------|
| 31 | Elongation factor 1-delta                   | <a href="#">gi 13124192</a> | 31274<br>4.91 | 272 | 17 | R.ITSLEVENQNLR.G<br>R.FYEQMNGPVTSGSR.Q<br>K.SLAGSSGPGASSGPGGDHSELIVR.I                                                                                     | BC=BT<br>MC>BC<br>1.19<br>MC=BT         |
| 32 | phosphoglycerate kinase                     | <a href="#">gi 202423</a>   | 44508<br>7.53 | 658 | 22 | K.LGDVYVNDAFGTAHR.A<br>K.ALESPERPFLAILGGAK.V<br>K.ITLPVDFVTADKFDENAK.T<br>K.QIVWNGPVGVFWEAFAR.G<br>K.QIVWNGPVGVFWEAFAR.G<br>K.DCVGPEVENACANPAAGTVILLENLR.F | BC=BT<br>MC<BC<br>1.80<br>MC<BT<br>1.94 |
|    | long-chain acyl-CoA<br>dehydrogenase        | <a href="#">gi 726095</a>   | 48052<br>8.34 | 154 | 8  | R.IFSSEHDIFR.E<br>K.AQDTAELFFEDVR.L<br>K.GFYLLMQELPQER.L                                                                                                   |                                         |
|    | heparin binding protein 44                  | <a href="#">gi 220434</a>   | 42058<br>7.49 | 104 | 6  | K.LIHNLNVILAR.Y<br>K.IQEYNVLLDTLSR.A                                                                                                                       |                                         |
| 33 | beta-galactoside binding<br>protein         | <a href="#">gi 193442</a>   | 14796<br>5.32 | 341 | 33 | K.LPDGHEFK.F<br>K.EDGTWGTEHR.E<br>K.DSNNLC_LHFNPR.F<br>R.FNAHGDANTIVC_NTK.E                                                                                | BC=BT<br>MC<BC<br>1.99<br>MC<BT<br>1.97 |
| 35 | 10 kDa heat shock<br>protein, mitochondrial | <a href="#">gi 6680309</a>  | 10956<br>7.93 | 330 | 43 | K.FLPLFDR.V<br>R.KFLPLFDR.V<br>K.VLLPEYGGTK.V<br>K.VLQATVVAVGSGGK.G<br>K.VVLDDKDYFLFR.D                                                                    | BC=BT<br>MC<BC<br>1.56<br>MC<BT<br>1.69 |
|    | macrophage migration<br>inhibitory fator    | <a href="#">gi 6754696</a>  | 12496<br>6.79 | 166 | 17 | K.LLCGLLSDR.L<br>M.PMFIVNTNVPR.A<br>M.PMFIVNTNVPR.A                                                                                                        |                                         |
| 36 | D-dopachrome<br>decarboxylase               | <a href="#">gi 6753618</a>  | 13069<br>6.09 | 68  | 11 | M.PFVELETNLPASR.I                                                                                                                                          | BC=BT<br>MC<BC<br>2.05<br>MC=BT         |



|    |                                                      |                              |               |     |    |                                                                                                                                                                                                                               |                                         |
|----|------------------------------------------------------|------------------------------|---------------|-----|----|-------------------------------------------------------------------------------------------------------------------------------------------------------------------------------------------------------------------------------|-----------------------------------------|
| 38 | Stress-induced phosphoprotein 1                      | <a href="#">gil13277819</a>  | 62528<br>6.40 | 201 | 5  | K.AAALEFLNR.F<br>K.LMDVGLIAIR.-<br>R.KAAALEFLNR.F<br>K.LDPQNHVLYSNR.S                                                                                                                                                         | BC=BT<br>MC>BC<br>1.30<br>MC>BT<br>1.46 |
|    | Matricin                                             | <a href="#">gil347839</a>    | 60450<br>6.23 | 73  | 4  | R.AVAQALEVIPR.T<br>K.TAVETAVLLLR.I                                                                                                                                                                                            |                                         |
| 40 | guanosine diphosphate (GDP) dissociation inhibitor 2 | <a href="#">gil148700276</a> | 52911<br>8.66 | 98  | 4  | K.MLLFTEVTR.Y<br>K.DLGTDSQIFISR.A                                                                                                                                                                                             | BC=BT<br>MC<BC<br>1.19<br>MC=BT         |
| 41 | glyceraldehyde-3-phosphate dehydrogenase             | <a href="#">gil6679937</a>   | 35787<br>8.44 | 442 | 19 | R.VPTPNVSVDLT <del>C</del> R.L<br>K.LVINGKPITIFQER.D<br>K.LISWYDNEYGYSNR.V<br>K.VIHDNFGIVEGLMTTVHAITATQK.T                                                                                                                    | BC=BT<br>MC<BC<br>1.27<br>MC=BT         |
| 43 | cytochrome b5                                        | <a href="#">gil13385268</a>  | 15232<br>4.96 | 426 | 41 | K.STWVILHHK.V<br>K.TYIIGELHPDDR.S<br>K.FLEEHPGGEEVLR.E<br>R.EQAGGDATENFEDVGHSTDAR.E                                                                                                                                           | BC=BT<br>MC>BC<br>1.40<br>MC>BT<br>1.72 |
|    | eukaryotic translation initiation factor 5a          | <a href="#">gil148680531</a> | 18356<br>5.08 | 62  | 7  | K.VHLVGIDIFTGK.K                                                                                                                                                                                                              |                                         |
| 44 | phosphoglycerate kinase                              | <a href="#">gil202423</a>    | 44508<br>7.53 | 658 | 22 | K.LGDVYVND <del>A</del> FGTAHR.A<br>K.ALESPERPFLAILGGAK.V<br>K.ITLPVDFVTADKFDENAK.T<br>K.QIVWNGPVG <del>V</del> FEWEAFAR.G<br>K.QIVWNGPVG <del>V</del> FEWEAFAR.G<br>K.DC <del>V</del> GP <del>E</del> VENACANPAAGTVILLENLR.F | BC=BT<br>MC<BC<br>1.73<br>MC<BT<br>2.09 |

|    |                                          |                              |               |     |    |                                                                                                                                                                       |                                         |
|----|------------------------------------------|------------------------------|---------------|-----|----|-----------------------------------------------------------------------------------------------------------------------------------------------------------------------|-----------------------------------------|
| 45 | macrophage migration inhibitory factor   | <a href="#">gi 6754696</a>   | 12496<br>6.79 | 166 | 17 | K.LLCGLLSDR.L<br>M.PMFIVNTNVPR.A<br>M.PMFIVNTNVPR.A                                                                                                                   | BC=BT<br>MC<BC<br>1.50<br>MC<BT<br>1.68 |
| 46 | heat shock protein 70 cognate            | <a href="#">gi 309319</a>    | 70793<br>5.37 | 646 | 14 | K.FELTGIPPAPR.G<br>K.VEIIANDQGNR.T<br>R.FEELNADLFR.G<br>R.RFDDAVVQSDMK.H<br>R.TTPSYVAFTDTER.L<br>K.STAGDTHLGGEDFDNR.M<br>K.TVTNAVVTVPAYFNDSQR.Q                       | BC=BT<br>MC>BC<br>2.05<br>MC=BT         |
|    | glyceraldehyde-3-phosphate dehydrogenase | <a href="#">gi 6679937</a>   | 35787<br>8.44 | 442 | 19 | R.VPTPNVSVVDLTQR.L<br>K.LVINGKPITIFQER.D<br>K.LISWYDNEYGYSNR.V<br>K.VIHDNFGIVEGLMTTVHAITATQK.T                                                                        |                                         |
| 48 | protein disulfide-isomerase A3 precursor | <a href="#">gi 112293264</a> | 56643<br>5.88 | 690 | 20 | K.QAGPASVPLR.T<br>K.DASVVGFFR.D<br>K.FVMQEEFSR.D<br>R.LAPEYEEAATR.L<br>R.FAHTNIESLVK.E<br>R.ELNDFISYLQR.E<br>K.EYDDNGEGITIFRPLHLANK.F<br>K.TFSHELSDFGLESTTGEVPVVAIR.T | BC=BT<br>MC<BC<br>1.35<br>MC<BT<br>1.32 |
| 53 | nucleophosmin isoform 1                  | <a href="#">gi 6679108</a>   | 32540<br>4.62 | 417 | 19 | K.DLKPSTPR.S<br>K.VDNDENEHQLSLR.T<br>R.MTDQEIQDLWQWR.K<br>R.MTDQEIQDLWQWR.K<br>K.MSVQPTVSLGGFEITPPVVL.R.L<br>K.MSVQPTVSLGGFEITPPVVL.R.L                               | BC=BT<br>MC<BC<br>1.47<br>MC=BT         |
| 56 | phosphoglycerate kinase                  | <a href="#">gi 202423</a>    | 44508<br>7.53 | 658 | 22 | K.LGDVYVNDAFGTAHR.A<br>K.ALESPERPFLAILGGAK.V<br>K.ITLPVDFVTADKFDENAK.T<br>K.QIVWNGPVGVFWEAFAR.G<br>K.QIVWNGPVGVFWEAFAR.G<br>K.DCVGPEVENACANPAAGTVILLENLR.F            | BC=BT<br>MC<BC<br>1.80<br>MC<BT<br>2.22 |

|    |                                               |                             |               |     |    |                                                                                                                         |                                         |
|----|-----------------------------------------------|-----------------------------|---------------|-----|----|-------------------------------------------------------------------------------------------------------------------------|-----------------------------------------|
| 58 | peptidyl-prolyl cis-trans isomerase A         | <a href="#">gi 6679439</a>  | 17960<br>7.74 | 394 | 37 | R.VSFELFADK.V<br>K.FEDENFILK.H<br>K.EGMNIVEAMER.F<br>R.IIPGFMCQGGDFTR.H<br>R.IIPGFMCQGGDFTR.H<br>M.VNPTVFFDITADDEPLGR.V | BC=BT<br>MC<BC<br>1.26<br>MC=BT         |
| 59 | Stress-induced phosphoprotein 1               | <a href="#">gi 13277819</a> | 62528<br>6.40 | 201 | 5  | K.AAALEFLNR.F<br>K.LMDVGLIAIR.-<br>R.KAAALEFLNR.F<br>K.LDPQNHVLYSNR.S                                                   | BC=BT<br>MC>BC<br>1.40<br>MC>BT<br>1.47 |
| 61 | protein disulfide isomerase-related protein 5 | <a href="#">gi 1710248</a>  | 46170<br>4.95 | 107 | 7  | K.GSFSEQGINEFLR.E<br>-.LYSSDDVIELTPSNFNR.E                                                                              | BC=BT<br>MC>BC<br>1.47<br>MC>BT<br>1.59 |
| 62 | glyceraldehyde-3-phosphate dehydrogenase      | <a href="#">gi 6679937</a>  | 35787<br>8.44 | 442 | 19 | R.VPTPNVSVVDLTQR.L<br>K.LVINGKPITIFQER.D<br>K.LISWYDNEYGYSNR.V<br>K.VIHDNFGIVEGLMTTVHAITATQK.T                          | BC=BT<br>MC<BC<br>1.22<br>MC<BT<br>1.30 |
|    | peroxiredoxin-1                               | <a href="#">gi 6754976</a>  | 22162<br>8.26 | 218 | 20 | K.IGYPAPNFK.A<br>R.TIAQDYGVLK.A<br>R.LVQAFQFTDK.H<br>R.QITINDLPVGR.S<br>R.QITINDLPVGR.S                                 |                                         |
|    | peroxiredoxin-4 precursor                     | <a href="#">gi 7948999</a>  | 31033<br>6.67 | 82  | 4  | R.QITLNDLPVGR.S<br>R.QITLNDLPVGR.S                                                                                      |                                         |
| 63 | glyceraldehyde-3-phosphate dehydrogenase      | <a href="#">gi 6679937</a>  | 35787<br>8.44 | 442 | 19 | R.VPTPNVSVVDLTQR.L<br>K.LVINGKPITIFQER.D<br>K.LISWYDNEYGYSNR.V<br>K.VIHDNFGIVEGLMTTVHAITATQK.T                          | BC=BT<br>MC<BC<br>1.26<br>MC<BT<br>1.25 |
| 64 | glutathione S-transferase P 1                 | <a href="#">gi 10092608</a> | 23594<br>7.68 | 216 | 12 | -.PPYTIVYFPVR.G<br>K.FEDGDLTLYQSNAILR.H                                                                                 | BC=BT<br>MC>BC                          |

|    |                                                                   |                             |               |     |    |                                                                                                                                                            |                                         |
|----|-------------------------------------------------------------------|-----------------------------|---------------|-----|----|------------------------------------------------------------------------------------------------------------------------------------------------------------|-----------------------------------------|
|    | thioredoxin-dependent peroxide reductase, mitochondrial precursor | <a href="#">gil6680690</a>  | 28109<br>7.15 | 173 | 9  | K.HLSVNDLPVGR.S<br>R.DYGVLLSAGIALR.G                                                                                                                       | 1.30<br>MC>BT<br>1.35                   |
|    | PEST proteolytic signal-containing nuclear protein                | <a href="#">gil71480098</a> | 18951<br>6.86 | 83  | 6  | K.FGFAIGSQATAR.K                                                                                                                                           |                                         |
| 67 | Stress-induced phosphoprotein 1                                   | <a href="#">gil13277819</a> | 62528<br>6.40 | 201 | 5  | K.AAALEFLNR.F<br>K.LMDVGLIAIR.-<br>R.KAAALEFLNR.F<br>K.LDPQNHVLYSNR.S                                                                                      | BC=BT<br>MC>BC<br>1.41<br>MC>BT<br>1.45 |
| 68 | Chain E, Cytochrome C Oxidase At The Fully Oxidized State         | <a href="#">gil1942990</a>  | 12428<br>5.01 | 178 | 21 | R.LNDFASAVR.I<br>-.SHGSHTDEEFDAR.W                                                                                                                         | BC=BT<br>MC<BC<br>1.59<br>MC=BT         |
| 70 | aldolase C                                                        | <a href="#">gil229506</a>   | 38993<br>9.06 | 195 | 14 | K.ELSDIAHR.I<br>R.QLLLTADDR.V<br>K.ADDGRPFPQVIK.S<br>K.GVVPLAGTDGETTTQGLDGLSER.C                                                                           | BC=BT<br>MC<BC<br>1.42<br>MC<BT<br>1.67 |
| 71 | phosphoglycerate kinase                                           | <a href="#">gil202423</a>   | 44508<br>7.53 | 658 | 22 | K.LGDVYVNDAFGTAHR.A<br>K.ALESPERPFLAILGGAK.V<br>K.ITLPVDFVTADKFDENAK.T<br>K.QIVWNGPVGVFWEAFAR.G<br>K.QIVWNGPVGVFWEAFAR.G<br>K.DCVGPEVENACANPAAGTVILLENLR.F | BC=BT<br>MC<BC<br>1.41<br>MC=BT         |
| 76 | heat shock protein 70 cognate                                     | <a href="#">gil309319</a>   | 70793<br>5.37 | 646 | 14 | K.FELTGIPPAPR.G<br>K.VEIIANDQGNR.T<br>R.FEELNADLFR.G<br>R.RFDDAVVQSDMK.H<br>R.TTPSYVAFTDTER.L<br>K.STAGDTHLGGEDFDNR.M<br>K.TVTNAVVTVPAYFNDSQR.Q            | BC=BT<br>MC>BC<br>1.69<br>MC>BT<br>1.98 |
|    | mitochondrial stress-70 protein                                   | <a href="#">gil407341</a>   | 73483<br>5.91 | 313 | 8  | K.VQQTVDLFR.A<br>K.SDIGEVILVGGMTR.M<br>K.LLGQFTLIGIPPAPR.G<br>K.NAVITVPAYFNDSQR.Q                                                                          |                                         |

|    |                             |                              |               |     |    |                                                                                                                                                                                                        |                                         |
|----|-----------------------------|------------------------------|---------------|-----|----|--------------------------------------------------------------------------------------------------------------------------------------------------------------------------------------------------------|-----------------------------------------|
| 77 | Prostaglandina E synthase 3 | <a href="#">gi 9790017</a>   | 18709<br>4.36 | 140 | 18 | R.SILCCLR.K<br>R.KGESGQSWPR.L<br>K.LTFSC <sub>2</sub> LGGSDFK.H                                                                                                                                        | BC=BT<br>MC>BC<br>1.33<br>MC>BT<br>1.63 |
| 79 | pyruvate kinase M           | <a href="#">gi 551295</a>    | 57824<br>7.58 | 687 | 24 | K.GDYPLEAVR.M<br>R.LDIDSAPITAR.N<br>R.NTGIICTIGPASR.S<br>K.IYVDDGLISLQVK.E<br>K.DAVLNAWAEDVDLR.V<br>R.FDEILEASDGIMVAR.G<br>R.LNFSHGTHEYHAETIK.N<br>R.EAEAAIYHLQLFEELR.R<br>R.EATESFASDPILYRPVAVALDTK.G | BC=BT<br>MC>BC<br>1.19<br>MC=BT         |
| 80 | nucleophosmin isoform 1     | <a href="#">gi 6679108</a>   | 32540<br>4.62 | 417 | 19 | K.DLKPSTPR.S<br>K.VDNDENEHQLSLR.T<br>R.MTDQEAIQDLWQWR.K<br>R.MTDQEAIQDLWQWR.K<br>K.MSVQPTVSLGGFEITPPVVLR.L<br>K.MSVQPTVSLGGFEITPPVVLR.L                                                                | BC=BT<br>MC<BC<br>1.35<br>MC=BT         |
|    | calreticulin precursor      | <a href="#">gi 6680836</a>   | 47965<br>4.33 | 249 | 9  | K.EQFLDGDWNTNR.W<br>K.HEQNIDCGGGYVK.L<br>K.IKDPDAAKPEDWDER.A                                                                                                                                           |                                         |
| 81 | mCG13235                    | <a href="#">gi 148684097</a> | 15406<br>9.82 | 188 | 25 | K.EGLPPDQQR.L<br>K.ESLHLVLR.L<br>K.TITLEVEPSDTIENVK.A                                                                                                                                                  | BC=BT<br>MC>BC<br>1.64<br>MC=BT         |
|    | polyubiquitin, partial      | <a href="#">gi 1675359</a>   | 4605<br>4.72  | 118 | 39 | K.TITLEVEPSDTIENVK.A<br>K.TITLEVEPDDTIENVK.A                                                                                                                                                           |                                         |
|    | NEDD8 precursor             | <a href="#">gi 6679034</a>   | 8967<br>6.59  | 106 | 34 | K.ILGGSVLHLVLALR.G<br>K.EIEIDIEPTDKVER.I                                                                                                                                                               |                                         |
| 83 | alpha-fetoprotein, partial  | <a href="#">gi 191765</a>    | 47195<br>5.47 | 212 | 9  | K.APQVSTPTLVEAAR.N<br>K.LGEYGFQNAILVR.Y<br>K.DVFLGTFLYEYSR.R                                                                                                                                           | BC=BT<br>MC>BC<br>1.38<br>MC>BT<br>1.26 |

|    |                                                             |                             |               |     |    |                                                                                                                                                                                 |                                 |
|----|-------------------------------------------------------------|-----------------------------|---------------|-----|----|---------------------------------------------------------------------------------------------------------------------------------------------------------------------------------|---------------------------------|
| 84 | gamma-actin                                                 | <a href="#">gi 809561</a>   | 40992<br>5.56 | 691 | 25 | K.AGFAGDDAPR.A<br>R.GYSFTTTAER.E<br>R.AVFPSIVGRPR.H<br>K.QEYDESGPSIVHR.K<br>K.IWHHTFYNELR.V<br>K.SYELPDGQVITIGNER.F<br>K.DLYANTVLSSGGTTMYPGIADR.M<br>K.DLYANTVLSSGGTTMYPGIADR.M | BC=BT<br>MC<BC<br>1.05<br>MC=BT |
|    | put. beta-actin (aa 27-375)                                 | <a href="#">gi 49868</a>    | 39161<br>5.78 | 629 | 22 | R.AVFPSIVGR.S<br>R.GYSFTTTAER.E<br>K.QEYDESGPSIVHR.K<br>K.IWHHTFYNELR.V<br>K.SYELPDGQVITIGNER.F<br>K.DLYANTVLSSGGTTMYPGIADR.M<br>K.DLYANTVLSSGGTTMYPGIADR.M                     |                                 |
|    | Eukaryotic translation<br>initiation factor 3, subunit<br>F | <a href="#">gi 47682703</a> | 37857<br>5.33 | 175 | 16 | K.YAYYDTER.I<br>R.VIGLSSDLQQVGGASAR.I<br>R.LHPVILASIVDSYER.R<br>R.EAPNPIHLTVDTGLQHGR.M                                                                                          |                                 |
| 85 | Vimentin                                                    | <a href="#">gi 55408</a>    | 53689<br>5.06 | 455 | 17 | R.DNLAEDIMR.L<br>K.FADLSEAANR.N<br>K.VELQELNDR.F<br>R.LGDLYEEEMR.D<br>K.MALDIEIATYR.K<br>R.ISLPLPTFSSLNLR.E<br>R.EMEENFALEAANYQDTIGR.L                                          | BC=BT<br>MC>BC<br>1.30<br>MC=BT |
| 87 | glyceraldehyde-3-<br>phosphate<br>dehydrogenase             | <a href="#">gi 6679937</a>  | 35787<br>8.44 | 442 | 19 | R.VPTPNVSVVDLTQR.L<br>K.LVINGKPITIFQER.D<br>K.LISWYDNEYGYSNR.V<br>K.VIHDNFGIVEGLMTTVHAITATQK.T                                                                                  | BC=BT<br>MC=BC<br>MC<BT<br>1.20 |
| 88 | annexin A5                                                  | <a href="#">gi 6753060</a>  | 35730<br>4.83 | 267 | 18 | K.FITIFGTR.S<br>R.SEIDLFNIR.K<br>R.GTVTDFPGFDGR.A<br>K.GLGTDEDSILNLLTSR.S<br>K.YMTISGFQIEETIDR.E                                                                                | BC=BT<br>MC=BC<br>MC>BT<br>1.33 |

|    |                                                      |                             |               |     |    |                                                                                                                                                                          |                                 |
|----|------------------------------------------------------|-----------------------------|---------------|-----|----|--------------------------------------------------------------------------------------------------------------------------------------------------------------------------|---------------------------------|
| 91 | glyceraldehyde-3-phosphate dehydrogenase             | <a href="#">gi 6679937</a>  | 35787<br>8.44 | 442 | 19 | R.VPTPNVSVVDLT <del>C</del> R.L<br>K.LVINGKPITIFQER.D<br>K.LISWYDNEYGYSNR.V<br>K.VIHDNFGIVEGLMTTVHAITATQK.T                                                              | BC=BT<br>MC=BC<br>MC<BT<br>1.45 |
|    | aldolase C                                           | <a href="#">gi 229506</a>   | 38993<br>9.06 | 195 | 14 | K.ELSDIAHR.I<br>R.QLLLTADDR.V<br>K.ADDGRPFPQVIK.S<br>K.GVVPLAGTDGETTTQGLDGLSER.C                                                                                         |                                 |
| 92 | glyceraldehyde-3-phosphate dehydrogenase             | <a href="#">gi 6679937</a>  | 35787<br>8.44 | 442 | 19 | R.VPTPNVSVVDLT <del>C</del> R.L<br>K.LVINGKPITIFQER.D<br>K.LISWYDNEYGYSNR.V<br>K.VIHDNFGIVEGLMTTVHAITATQK.T                                                              | BC=BT<br>MC=BC<br>MC<BT<br>1.41 |
|    | alcohol dehydrogenase [NADP(+)]                      | <a href="#">gi 10946870</a> | 36564<br>6.90 | 75  | 6  | K.ALGLSNFNSR.Q<br>K.HHPEDVEPALR.K                                                                                                                                        |                                 |
| 93 | beta-galactoside binding protein                     | <a href="#">gi 193442</a>   | 14796<br>5.32 | 341 | 33 | K.LPDGHEFK.F<br>K.EDGTWGTEHR.E<br>K.DSNNL <del>C</del> LHFNPR.F<br>R.FNAHGDANTIV <del>C</del> NTK.E                                                                      | BC=BT<br>MC=BC<br>MC<BT<br>1.40 |
| 94 | T-complex protein 1 subunit zeta                     | <a href="#">gi 6753324</a>  | 57968<br>6.63 | 95  | 2  | K_QADLYISEGLHPR.I<br>K.QADLYISEGLHPR.I                                                                                                                                   | BC=BT<br>MC=BC<br>MC>BT<br>1.23 |
| 95 | phosphoglycerate kinase                              | <a href="#">gi 202423</a>   | 44508<br>7.53 | 658 | 22 | K.LGDVYVNDAFGTAHR.A<br>K.ALESPERPFLAILGGAK.V<br>K.ITLPVDFVTADKFDENAK.T<br>K_QIVWNGPVGVFWEAFAR.G<br>K.QIVWNGPVGVFWEAFAR.G<br>K.DC <del>V</del> VGPEVENACANPAAGTVILLENLR.F | BC=BT<br>MC=BC<br>MC<BT<br>1.59 |
| 96 | 1,2-dihydroxy-3-keto-5-methylthiopentene dioxygenase | <a href="#">gi 19527270</a> | 21510<br>5.31 | 92  | 6  | R.YILEGSGYFDVR.D                                                                                                                                                         | BC=BT<br>MC=BC<br>MC>BT<br>1.21 |
|    | 39S ribosomal protein L12, mitochondrial precursor   | <a href="#">gi 22164792</a> | 21695<br>9.34 | 78  | 5  | K.NYVQGINLVQAK.K                                                                                                                                                         |                                 |

|     |                                                                   |                             |               |     |    |                                                                                                                                                                                                         |                                 |
|-----|-------------------------------------------------------------------|-----------------------------|---------------|-----|----|---------------------------------------------------------------------------------------------------------------------------------------------------------------------------------------------------------|---------------------------------|
| 98  | heat shock protein 70 cognate                                     | <a href="#">gij309319</a>   | 70793<br>5.37 | 646 | 14 | K.FELTGIPPAPR.G<br>K.VEIIANDQGNR.T<br>R.FEELNADLFR.G<br>R.RFDDAVVQSDMK.H<br>R.TTPSYVAFTDTER.L<br>K.STAGDTHLGGEDFDNR.M<br>K.TVTNAVVTVPAYFNDSQR.Q                                                         | BC=BT<br>MC=BC<br>MC>BT<br>1.70 |
|     | mitochondrial stress-70 protein                                   | <a href="#">gij407341</a>   | 73483<br>5.91 | 313 | 8  | K.VQQTVDLFR.A<br>K.SDIGEVILVGGMTR.M<br>K.LLGQFTLIGIPPAPR.G<br>K.NAVITVPAYFNDSQR.Q                                                                                                                       |                                 |
| 100 | vacuolar protein-sorting-associated protein 25 isoform 2          | <a href="#">gij25092662</a> | 20735<br>5.97 | 192 | 17 | K.SSFLIMWR.R<br>K.LIYQWVSR.S<br>R.FPPFFTLQPNVDTR.Q                                                                                                                                                      | BC=BT<br>MC=BC<br>MC<BT<br>1.28 |
| 101 | pyruvate kinase M                                                 | <a href="#">gij551295</a>   | 57824<br>7.58 | 687 | 24 | K.GDYPLEAVR.M<br>R.LDIDSAPITAR.N<br>R.NTGIICTIGPASR.S<br>K.IYVDDGLISLQVK.E<br>K.DAVLNAWAEDVDLR.V<br>R.FDEILEASDGIMVAR.G<br>R.LNFSGHGTHEYHAETIK.N<br>R.EAEAAIYHLQLFEELR.R<br>R.EATESFASDPILYRPVAVALDTK.G | BC=BT<br>MC=BC<br>MC<BT<br>1.35 |
|     | tubulin beta-5 chain                                              | <a href="#">gij7106439</a>  | 49639<br>4.78 | 90  | 6  | R.FPGQLNADLR.K<br>K.GHYTEGAELVDSVLDVVR.K                                                                                                                                                                |                                 |
| 102 | peptidyl-prolyl cis-trans isomerase A                             | <a href="#">gij6679439</a>  | 17960<br>7.74 | 394 | 37 | R.VSFELFADK.V<br>K.FEDENFILK.H<br>K.EGMNIVEAMER.F<br>R.IIPGFMCGGDFTR.H<br>R.IIPGFMCGGDFTR.H<br>M.VNPTVFFDITADDEPLGR.V                                                                                   | BC=BT<br>MC=BC<br>MC<BT<br>1.13 |
| 103 | thioredoxin-dependent peroxide reductase, mitochondrial precursor | <a href="#">gij6680690</a>  | 28109<br>7.15 | 173 | 9  | K.HLSVNDLPVGR.S<br>R.DYGVLLSESAGIALR.G                                                                                                                                                                  | BC=BT<br>MC=BC<br>MC>BT         |



|     |                                                |                             |               |     |    |                                                                                                                                                |                                 |
|-----|------------------------------------------------|-----------------------------|---------------|-----|----|------------------------------------------------------------------------------------------------------------------------------------------------|---------------------------------|
|     | trafficking protein particle complex subunit 4 | <a href="#">gi 11140825</a> | 24370<br>5.83 | 135 | 17 | K.FVVLADPR.Q<br>K.AGGLIYQWDSYSPR.A<br>K.EVLEYLGNPANYPVSIR.F                                                                                    | 1.54                            |
|     | ER membrane protein complex subunit 8          | <a href="#">gi 6754870</a>  | 23333<br>5.72 | 106 | 7  | R.SYETLVDFDNHLDDIR.N                                                                                                                           |                                 |
| 104 | beta-galactoside binding protein               | <a href="#">gi 193442</a>   | 14796<br>5.32 | 341 | 33 | K.LPDGHEFK.F<br>K.EDGTWGTEHR.E<br>K.DSNNLCLHFNPR.F<br>R.FNAHGDANTIVCNTK.E                                                                      | BC=BT<br>MC=BC<br>MC<BT<br>1.62 |
| 105 | glyceraldehyde-3-phosphate dehydrogenase       | <a href="#">gi 6679937</a>  | 35787<br>8.44 | 442 | 19 | R.VPTPNVSVVDLT <u>C</u> R.L<br>K.LVINGKPITIFQER.D<br>K.LISWYDNEYGYSNR.V<br>K.VIHDNFGIVEGLMTTVHAITATQK.T                                        | BC=BT<br>MC=BC<br>MC<BT<br>1.46 |
| 106 | glyceraldehyde-3-phosphate dehydrogenase       | <a href="#">gi 6679937</a>  | 35787<br>8.44 | 442 | 19 | R.VPTPNVSVVDLT <u>C</u> R.L<br>K.LVINGKPITIFQER.D<br>K.LISWYDNEYGYSNR.V<br>K.VIHDNFGIVEGLMTTVHAITATQK.T                                        | BC=BT<br>MC=BC<br>MC<BT<br>1.37 |
| 107 | glyceraldehyde-3-phosphate dehydrogenase       | <a href="#">gi 6679937</a>  | 35787<br>8.44 | 442 | 19 | R.VPTPNVSVVDLT <u>C</u> R.L<br>K.LVINGKPITIFQER.D<br>K.LISWYDNEYGYSNR.V<br>K.VIHDNFGIVEGLMTTVHAITATQK.T                                        | BC=BT<br>MC=BC<br>MC<BT<br>1.18 |
| 108 | Destrin                                        | <a href="#">gi 9790219</a>  | 18509<br>8.14 | 95  | 7  | K.HEYQANGPEDLNR.T                                                                                                                              | BC=BT<br>MC=BC<br>MC>BT<br>1.30 |
| 110 | 14-3-3 protein epsilon                         | <a href="#">gi 13928824</a> | 29103<br>4.55 | 360 | 20 | K.DSTLIMQLLR.D<br>K.DSTLIMQLLR.D<br>R.YLAEFATGNDR.K<br>R.YLAEFATGNDRK.E<br>K.VAGMDVELTVEER.N<br>K.AASDIAMTELPPTHPIR.L<br>K.AASDIAMTELPPTHPIR.L | BC=BT<br>MC=BC<br>MC<BT<br>1.16 |

|     |                                                   |                              |               |     |    |                                                                                                                                                                                           |                                 |
|-----|---------------------------------------------------|------------------------------|---------------|-----|----|-------------------------------------------------------------------------------------------------------------------------------------------------------------------------------------------|---------------------------------|
| 113 | phosphoglycerate mutase<br>1                      | <a href="#">gi 114326546</a> | 28814<br>6.67 | 824 | 54 | R.VLIAAHGNSLR.G<br>R.HGESAWNLENR.F<br>R.ALFWNEEIVPQIK.E<br>R.DAGYEFDICFTSVQK.R<br>R.FSGWYDADLSPAGHEEAK.R<br>K.NLKPIKPMQFLGDEETVR.K<br>K.NLKPIKPMQFLGDEETVR.K<br>R.SYDVPPPPMEPDHPFYSNISK.D | BC=BT<br>MC=BC<br>MC<BT<br>1.32 |
|     | calcyclin binding protein                         | <a href="#">gi 3142331</a>   | 28301<br>7.78 | 175 | 18 | K.TDTVILCR.K<br>K.ISNYGWDQSDK.F<br>K.IYITLTGVHQVPTENVQVHFTER.S                                                                                                                            |                                 |
| 114 | Enolase 1, (alpha)                                | <a href="#">gi 59808815</a>  | 47128<br>6.16 | 667 | 23 | R.IGAEVYHNLK.N<br>R.GNPTVEVDLYTAK.G<br>R.YITPDQLADLYK.S<br>K.LAQSNWGVMSHR.S<br>R.AAVPSGASTGIYEALER.D<br>K.LAMQEFMILPVGASSFR.E<br>K.AGYTDQVVIGMDVAASEFYR.S                                 | BC=BT<br>MC=BC<br>MC<BT<br>1.29 |
| 116 | alpha-fetoprotein, partial                        | <a href="#">gi 191765</a>    | 47195<br>5.47 | 212 | 9  | K.APQVSTPTLVEAAR.N<br>K.LGEYGFQNAILVR.Y<br>K.DVFLGTFLYEYSR.R                                                                                                                              | BC=BT<br>MC=BC<br>MC<BT<br>1.40 |
|     | F-actin-capping protein<br>subunit beta isoform a | <a href="#">gi 83649737</a>  | 31326<br>5.47 | 84  | 5  | K.LEVEANNAFDQYR.D<br>R.KLEVEANNAFDQYR.D                                                                                                                                                   |                                 |
| 117 | glyceraldehyde-3-<br>phosphate<br>dehydrogenase   | <a href="#">gi 6679937</a>   | 35787<br>8.44 | 442 | 19 | R.VPTPNVSVVDLTQR.L<br>K.LVINGKPITIFQER.D<br>K.LISWYDNEYGYSNR.V<br>K.VIHDNFGIVEGLMTTVHAITATQK.T                                                                                            | BC=BT<br>MC=BC<br>MC<BT<br>1.46 |
|     | macrophage migration<br>inhibitory factor         | <a href="#">gi 6754696</a>   | 12496<br>6.79 | 166 | 17 | K.LLCGLLSDR.L<br>M.PMFIVNTNVPR.A<br>M.PMFIVNTNVPR.A                                                                                                                                       |                                 |

GI: GenInfo code; pI: isoelectric point; BC: B16-F10 control; BT: B16-F10 treated; MC: Melan-a control and MT: Melan-a treated.

**Supplemental table 2: Functional categories of the identified proteins.**

| Functional category                                            | Spot #                                                 |
|----------------------------------------------------------------|--------------------------------------------------------|
| 01. Metabolism                                                 |                                                        |
| 1,2-dihydroxy-3-keto-5-methylthiopentene dioxygenase           | 96                                                     |
| Alcohol dehydrogenase [nadp(+)]                                | 92                                                     |
| Aldolase c                                                     | 70; 91                                                 |
| Alpha-fetoprotein, partial                                     | 30; 83; 116                                            |
| Cytochrome b5                                                  | 28; 43                                                 |
| D-dopachrome decarboxylase                                     | 36                                                     |
| Enolase 1, (alpha)                                             | 2; 27; 114                                             |
| Fatty acid-binding protein, epidermal isoform 1                | 25                                                     |
| Glutathione s-transferase p 1                                  | 13; 64                                                 |
| Glyceraldehyde-3-phosphate dehydrogenase                       | 13; 29; 41; 46; 62; 63; 87; 91; 92; 105; 106; 107; 117 |
| L-lactate dehydrogenase a chain isoform 1                      | 29                                                     |
| Long-chain acyl-coa dehydrogenase                              | 32                                                     |
| Macrophage migration inhibitory factor                         | 35; 45; 117                                            |
| Phosphoglycerate kinase                                        | 1; 19; 32; 44; 56; 71; 95                              |
| Phosphoglycerate mutase 1                                      | 5; 8; 113                                              |
| Prostaglandin e synthase 3                                     | 22                                                     |
| Pyruvate kinase m                                              | 10; 79; 101                                            |
| Triosephosphate isomerase                                      | 7                                                      |
| Tubulin beta-5 chain                                           | 101                                                    |
| 02. Energy                                                     |                                                        |
| Aldolase c                                                     | 70; 91                                                 |
| Enolase 1, (alpha)                                             | 2; 27; 114                                             |
| L-lactate dehydrogenase a chain isoform 1                      | 29                                                     |
| Long-chain acyl-coa dehydrogenase                              | 32                                                     |
| Phosphoglycerate kinase                                        | 1; 19; 32; 44; 56; 71; 95                              |
| Phosphoglycerate mutase 1                                      | 5; 8; 113                                              |
| Pyruvate kinase m                                              | 10; 79; 101                                            |
| Triosephosphate isomerase                                      | 7                                                      |
| 10. Cell cycle and DNA processing                              |                                                        |
| Calreticulin precursor                                         | 80                                                     |
| Cofilin-1                                                      | 9                                                      |
| Destrin                                                        | 108                                                    |
| Heat shock protein 70 cognate                                  | 4; 11; 46; 76; 98                                      |
| Prohibitin                                                     | 20                                                     |
| Stathmin                                                       | 16                                                     |
| Tubulin beta-5 chain                                           | 101                                                    |
| Vacuolar protein-sorting-associated protein 25 isoform 2       | 100                                                    |
| 11. Transcription                                              |                                                        |
| Nedd8 precursor                                                | 81                                                     |
| Vacuolar protein-sorting-associated protein 25 isoform 2       | 100                                                    |
| 12. Protein synthesis                                          |                                                        |
| 39s ribosomal protein l12, mitochondrial precursor             | 96                                                     |
| Elongation factor 1-delta                                      | 31                                                     |
| Eukaryotic translation initiation factor 3 subunit k isoform 1 | 22                                                     |
| Eukaryotic translation initiation factor 3, subunit f          | 84                                                     |
| Eukaryotic translation initiation factor 4h                    | 18                                                     |
| Eukaryotic translation initiation factor 5a                    | 43                                                     |
| Sui1 homolog                                                   | 15                                                     |
| 14. Protein fate (folding, modification, destination)          |                                                        |
| 10 kda heat shock protein, mitochondrial                       | 26; 35                                                 |
| 14-3-3 protein epsilon                                         | 110                                                    |

|                                                                                     |                           |
|-------------------------------------------------------------------------------------|---------------------------|
| Calcyclin binding protein                                                           | 18; 113                   |
| Calreticulin precursor                                                              | 80                        |
| Heat shock protein 65                                                               | 3; 14                     |
| Heat shock protein 70 cognate                                                       | 4; 11; 46; 76; 98         |
| Mitochondrial stress-70 protein                                                     | 76; 98                    |
| Nedd8 precursor                                                                     | 81                        |
| Nucleophosmin isoform 1                                                             | 12; 53; 80                |
| Phosphoglycerate kinase                                                             | 1; 19; 32; 44; 56; 71; 95 |
| Protein disulfide-isomerase a3 precursor                                            | 24; 30; 48                |
| T-complex protein 1 subunit zeta                                                    | 94                        |
| Tubulin beta-5 chain                                                                | 101                       |
| 16. Protein with binding function or cofactor requirement (structural or catalytic) |                           |
| 1,2-dihydroxy-3-keto-5-methylthiopentene dioxygenase                                | 96                        |
| 10 kda heat shock protein, mitochondrial                                            | 26; 35                    |
| 14-3-3 protein epsilon                                                              | 110                       |
| 39s ribosomal protein l12, mitochondrial precursor                                  | 96                        |
| Aldolase c                                                                          | 70; 91                    |
| Alpha-fetoprotein, partial                                                          | 30; 83; 116               |
| Annexin a5                                                                          | 88                        |
| Beta-galactoside binding protein                                                    | 33; 93; 104               |
| Calreticulin precursor                                                              | 80                        |
| Cofilin-1                                                                           | 9                         |
| Cytochrome b5                                                                       | 28; 43                    |
| Destrin                                                                             | 108                       |
| Elongation factor 1-delta                                                           | 31                        |
| Enolase 1, (alpha)                                                                  | 2; 27; 114                |
| Eukaryotic translation initiation factor 4h                                         | 18                        |
| F-actin-capping protein subunit beta isoform a                                      | 116                       |
| Fatty acid-binding protein, epidermal isoform 1                                     | 25                        |
| Guanosine diphosphate (gdp) dissociation inhibitor 2                                | 40                        |
| Heat shock protein 70 cognate                                                       | 4; 11; 46; 76; 98         |
| L-lactate dehydrogenase a chain isoform 1                                           | 29                        |
| Long-chain acyl-coa dehydrogenase                                                   | 32                        |
| Mitochondrial stress-70 protein                                                     | 76; 98                    |
| Nedd8 precursor                                                                     | 81                        |
| Nucleophosmin isoform 1                                                             | 12; 53; 80                |
| Phosphoglycerate kinase                                                             | 1; 19; 32; 44; 56; 71; 95 |
| Pyruvate kinase m                                                                   | 10; 79; 101               |
| Stathmin                                                                            | 16                        |
| Stress-induced phosphoprotein 1                                                     | 38; 59; 67                |
| T-complex protein 1 subunit zeta                                                    | 94                        |
| Thioredoxin-dependent peroxide reductase, mitochondrial precursor                   | 64; 103                   |
| Trafficking protein particle complex subunit 4                                      | 103                       |
| Translationally-controlled tumor protein                                            | 22                        |
| Tubulin beta-5 chain                                                                | 101                       |
| Vimentin                                                                            | 85                        |
| 18. Regulation of metabolism and protein function                                   |                           |
| Elongation factor 1-delta                                                           | 31                        |
| Guanosine diphosphate (gdp) dissociation inhibitor 2                                | 40                        |
| Rho gdp dissociation inhibitor (gdi) alpha                                          | 11                        |
| 20. Cellular transport, transport facilities and transport routes                   |                           |
| 1-cys peroxiredoxin protein                                                         | 7                         |
| Alpha-fetoprotein, partial                                                          | 30; 83; 116               |
| Cytochrome b5                                                                       | 28; 43                    |
| Fatty acid-binding protein, epidermal isoform 1                                     | 25                        |
| Long-chain acyl-coa dehydrogenase                                                   | 32                        |
| Mitochondrial stress-70 protein                                                     | 76; 98                    |

|                                                                   |                   |
|-------------------------------------------------------------------|-------------------|
| Peroxisredoxin-1                                                  | 62                |
| Trafficking protein particle complex subunit 4                    | 103               |
| Tubulin beta-5 chain                                              | 101               |
| Vacuolar protein-sorting-associated protein 25 isoform 2          | 100               |
| 30. Cellular communication/signal transduction mechanism          |                   |
| Beta-galactoside binding protein                                  | 33; 93; 104       |
| Rho gdp dissociation inhibitor (gdi) alpha                        | 11                |
| Stathmin                                                          | 16                |
| 32. Cell rescue, defense and virulence                            |                   |
| 1-cys peroxiredoxin protein                                       | 7                 |
| Glutathione s-transferase p 1                                     | 13; 64            |
| Heat shock protein 70 cognate                                     | 4; 11; 46; 76; 98 |
| Macrophage migration inhibitory fator                             | 35; 45; 117       |
| Mitochondrial stress-70 protein                                   | 76; 98            |
| Nucleophosmin isoform 1                                           | 12; 53; 80        |
| Peroxisredoxin-1                                                  | 62                |
| Peroxisredoxin-4 precursor                                        | 62                |
| Thioredoxin-dependent peroxide reductase, mitochondrial precursor | 64; 103           |
| 34. Interaction with the environment                              |                   |
| Cofilin-1                                                         | 9                 |
| Destrin                                                           | 108               |
| Heat shock protein 70 cognate                                     | 4; 11; 46; 76; 98 |
| Mitochondrial stress-70 protein                                   | 76; 98            |
| Stathmin                                                          | 16                |
| 36. Systemic interaction with the environment                     |                   |
| Annexin a5                                                        | 88                |
| Macrophage migration inhibitory fator                             | 35; 45; 117       |
| 40. Cell fate                                                     |                   |
| Cofilin-1                                                         | 9                 |
| Eukaryotic translation initiation factor 5a                       | 43                |
| F-actin-capping protein subunit beta isoform a                    | 116               |
| Macrophage migration inhibitory fator                             | 35; 45; 117       |
| Protein disulfide-isomerase a3 precursor                          | 24; 30; 48        |
| Translationally-controlled tumor protein                          | 22                |
| 41. Development (Systemic)                                        |                   |
| Cofilin-1                                                         | 9                 |
| Stathmin                                                          | 16                |
| Trafficking protein particle complex subunit 4                    | 103               |
| 42. Biogenesis of cellular components                             |                   |
| Calreticulin precursor                                            | 80                |
| Cofilin-1                                                         | 9                 |
| Destrin                                                           | 108               |
| F-actin-capping protein subunit beta isoform a                    | 116               |
| Stathmin                                                          | 16                |
| Tubulin beta-5 chain                                              | 101               |
| Vacuolar protein-sorting-associated protein 25 isoform 2          | 100               |
| Vimentin                                                          | 85                |
| 43. Cell type differentiation                                     |                   |
| Stathmin                                                          | 16                |
| Trafficking protein particle complex subunit 4                    | 103               |
| 45. Tissue differentiation                                        |                   |
| Alpha-fetoprotein, partial                                        | 30; 83; 116       |
| Stathmin                                                          | 16                |
| 47. Organ differentiation                                         |                   |
| Alpha-fetoprotein, partial                                        | 30; 83; 116       |
| Cofilin-1                                                         | 9                 |
| Stathmin                                                          | 16                |
